# Supplementary material
Source: Research Square preprint supplement (doi:10.21203/rs.3.rs-9418908/v1)
Supplement: Supplementary file 2 [file 63a37ff02e2cd46583dc330d.docx]

**Supplementary figures**

**Figure S1.** The schema-graph of gut-vascular barrier (GVB), which is the structural and functional unit formed by microvascular endothelial cells, pericytes and enteric glial cells.

**Figure S2.** The Pearson correlations of portal venous pressure with levels of plasma LPS (A) and serum cytokines of IL-1β (B), IL-6 (C) and TNF-α (D). n=6 to 8 for each group; all p<0.0001. (Supplement to Fig.1)

**Figure S3.** The HE staining images of colonic tissues of the control group, CCl4 group and CCl4+PPVL group (A), and the colonic levels of inflammatory cytokines of IL-1β (B), IL-6 (C) and TNF-α (D). n=6 to 8 for each group; ***p<0.001, ****p<0.0001. (Supplement to Fig.1)

**Figure S4.** The PV1 expression on the colonic vascular endothelium of the control group, CCl4 group and CCl4+PPVL group (A), and calculated as the PV1+/CD31+ area (B). n=5 for each group; **p<0.01, ****p<0.0001. (Supplement to Fig.1)

**Figure S5.** The HE staining images of colonic tissues of the sham group, PPVL-26G group and PPVL-27G group (A), and the colonic levels of inflammatory cytokines of IL-1β (B), IL-6 (C) and TNF-α (D). n=7 to 9 for each group; *p<0.05, **p<0.01, ***p<0.001, ****p<0.0001. (Supplement to Fig.2)

**Figure S6.** The PV1 expression on the colonic vascular endothelium of the sham group, PPVL-26G group and PPVL-27G group (A), and calculated as the PV1+/CD31+ area (B). n=5 for each group; *p<0.05, ***p<0.001, ****p<0.0001. (Supplement to Fig.2)

**Figure S7.** The protocol of identifying identified the microvascular ECls (CD45-CD90-CD31+) via flow cytometry with PE-Cy7-CD45 antibody, PerCP-Cy5.5-CD90 antibody and PE-CD31 antibody. Dead cells were removed from the analyses as DAPI-positive cells, and finally quantified the Piezo1 levels via FITC-Piezo1 antibody. (A-B) represented the typical flow cytometry analysis charts of samples for the ileum and colon from the CCl4 and control mice. (C-D) showed the ratio of CD45-CD90-CD31+ vascular ECs in ileum and colon of the CCl4 and control mice, respectively. n=6 to 8 for each group; *p<0.05. (Supplement to Fig.3)

**Figure S8.** The protocol of identifying identified the microvascular ECs (CD45-CD90-CD31+) via flow cytometry, refer to Fig. S7. (A-B) represented the typical flow cytometry analysis charts of samples for the ileum and colon from the PPVL-26G, PPVL-27G and sham mice. (C-D) displayed the ratio of CD45-CD90-CD31+ vascular ECs in ileum and colon of the PPVL-26G, PPVL-27G and sham mice, respectively. n=6 to 10 for each group; *p<0.05. (Supplement to Fig.3)

**Figure S9.** (A) Typical images of Sirius red staining and immunohistochemical staining (α-SMA) of liver tissues in CCl4 mice with Piezo1fl/fl (CCl4-WT) or Piezo1ΔEC (CCl4-KO) background. (B-C) The fibrosis ratio was calculated as the Sirius red+ and α-SMA+ area relative to total area in CCl4-WT and CCl4-KO mice. n=5 for each group; *p<0.05, **p<0.01. (Supplement to Fig.4)

**Figure S10.** (A) HE staining images of colonic tissues, and (B) levels of colonic inflammatory cytokines of IL-1β, IL-6 and TNF-α in the CCl4-WT and CCl4-KO mice. (C) HE staining images of colonic tissues, and (B) levels of colonic inflammatory cytokines of IL-1β, IL-6 and TNF-α in the PPVL-WT and PPVL-KO mice. n=8 to 9 for each group; *p<0.05, **p<0.01. (Supplement to Fig.4)

**Figure S11.** (A-B) The PV1 expression on the colonic vascular and the ratio of PV1+/CD31+ area in the CCl4-WT and CCl4-KO mice. (C-D) The PV1 expression on the colonic vascular and the ratio of PV1+/CD31+ area in the PPVL-WT and PPVL-KO mice. n=5 for each group; *p<0.05, **p<0.01. (Supplement to Fig.4)

**Figure S12.** (A) The cell viability of intestinal microvascular ECs treated with gradient Yoda1 using the CCK-8 test. N=4 to 6 for each group. (B) Relative mRNA expression of IL-1β and IL-6 in ECs treated with Yoda1. n=5 for each group. *p<0.05, **p<0.01, ****<0.0001. (Supplement to Fig.5)

**Figure S13.** Piezo1 silence in ECs through precondition with specific siRNA transfection. The efficacy of Piezo1 knockdown was confirmed via western blot (A), and significantly declined Piezo1 expression was observed in Piezo1-siRNA treated ECs (B). n=3 for each group; ****<0.0001. (Supplement to Fig.6)

**Figure S14.** (A) Relative mRNA expression of PV1 and junctional proteins including VE-cadherin, occludin, claudin-1, ZO-1 and JAM-A in ECs treated with hydrostatic pressure (2cm, 15cm, and 30cmH2O) and Piezo1-siRNA. (B) Relative mRNA expression of IL-1β and IL-6 in ECs stimulated by hydrostatic pressure and pretreating with Piezo1-siRNA. n=4 to 6 for each group; *p<0.05, **p<0.01, ***p<0.001. (Supplement to Fig.6)

**Figure S15.** Analysis of RNA sequencing data from ECs treated with Yoda1 and DMSO. (A) The principal co-ordinates analysis (PCoA) showed significant difference between groups. (B) The gene set enrichment analysis (GSEA) illustrated the enrichment of pathways associated with cell growth and proliferation. (C) The significant differential pathways according to the Kyoto Encyclopedia of Genes and Genomes (KEGG) database with a False Discovery Rate (FDR) threshold of 0.05. (D-F) The enrichment of VEGFR2 downstream pathways in ECs treated with Yoda1, including PI3K/Akt signaling, MAPK signaling and Ras signaling pathways. (Supplement to Fig.7)

**Figure S16.** (A) Typical images of VEGFR2 (green) expression in colonic vascular ECs (CD31, red) in CCl4 and PPVL mice with a Piezo1fl/fl (WT) or Piezo1ΔEC (KO) background. (B) The mRNA expression, and (C-E) the protein expression and phosphorylated level of VEGFR2 in colonic tissues of CCl4 and PPVL mice and those with endothelial Piezo1 KO. n=4 for each group. *p<0.05, **p<0.01. (Supplement to Fig.7)

**Figure S17.** (A-B) VEGFR2 knockdown in ECs through precondition with specific siRNA transfection, and confirmed via western blot. N=3 for each group. (C-D) Relative mRNA expression of IL-1β and IL-6 in ECs stimulated by hydrostatic pressure (30cmH2O) or Yoda1 (5μM), and the role of pretreating with VEGFR2-siRNA. n=5 to 6 for each group; *p<0.05, **p<0.01. (Supplement to Fig.8)
