# Supplementary material
Source: Research Square preprint supplement (doi:10.21203/rs.3.rs-9418908/v1)
Supplement: Supplementary file 3 [file 88defd3027ccf89710996bbf.docx]

**Table S2 The key resources or reagents in the study.**

| **Reagents or resources** | **Source** | **Catalogue number** |
| --- | --- | --- |
| ***Immunofluorescent*** |  |  |
| Piezo1 polyclonal antibody | Proteintech | 15939-1-AP |
| CD31 polyclonal antibody | RD-Systems | AF-3628 |
| PLVAP/PV-1 monoclonal antibody | Abcam | ab27853 |
| VE-cadherin monoclonal antibody | Abcam | ab205336 |
| ZO1 polyclonal antibody | Genetex | GTX108613 |
| Occludin polyclonal antibody | Proteintech | 27260-1-AP |
| Caludin-1 polyclonal antibody | Genetex | GTX134842 |
| JAM-A/CD321 polyclonal antibody | Proteintech | 16183-1-AP |
| VEGFR2/KDR polyclonal antibody | Proteintech | 26415-1-AP |
| Alexa Fluor 488-Goat anti Rabbit IgG | ABclonal | A-11008 |
| Alexa Fluor 488-Goat anti Rat IgG | ABclonal | A-11006 |
| Alexa Fluor 594-Donkey anti Mouse IgG | ABclonal | A-21203 |
| Alexa Fluor 594-Goat anti Rabbit IgG | ABclonal | A-11012 |
| DAPI | Antgene | ANT165 |
| ***Flow Cytometry*** |  |  |
| PE-CD31 antibody | BioLegend | 102407 |
| PE-Cy7-CD45 antibody | BioLegend | 103114 |
| PerCP-Cy5.5-CD90 antibody | BioLegend | 105338 |
| FITC-Piezo1 antibody | Novus | NBP1-78446 |
| DAPI | Antgene | ANT165 |
| Collagenase D | Roche | 11088858001 |
| Dispase II | Roche | 4942078001 |
| Dnase I | Roche | 10104159001 |
| ***Western Blot*** |  |  |
| Piezo1 Polyclonal antibody | Proteintech | 15939-1-AP |
| VEGFR2 polyclonal antibody | Proteintech | 26415-1-AP |
| Phospho-VEGFR2(Tyr1059) antibody | [Affinity](https://www.baidu.com/link?url=kJVgZQYVj3jYGuyxYUCPTwolsDYEno4yhhWMUpywkw090m6F0RqNRNUhF_MkAthe&wd=&eqid=937de2f00019d7530000000563dead67) | AF3279 |
| β-actin polyclonal antibody | Servicebio | GB12001-100 |
| HRP-conjugated Goat anti‒rabbit IgG | Invitrogen | 31460 |
| ***ELISA*** |  |  |
| Mouse TNF-α ELISA kit | Bioswap | MU30030 |
| Mouse IL-6 ELISA kit | Bioswap | MU30044 |
| Mouse IL-1β ELISA kit | Bioswap | MU30369 |
| Mouse Lipopolysaccharides ELISA kit | Bioswap | MU30451 |
