# Supplementary material
Source: Research Square preprint supplement (doi:10.21203/rs.3.rs-9418908/v1)
Supplement: Supplementary file 4 [file 8e505fc59b4bb05655db9c3a.docx]

**Supplementary Methods:**

**Hematoxylin & Eosin Staining**

The liver or intestinal samples were fixed in 4% paraformaldehyde for 24 h, routinely dehydrated, and embedded in paraffin for preservation. Tissue sections with a thickness of 4 µm were prepared and pasted on adhesive glass slides. The slides were subjected to conventional dewaxing and rehydration, staining with hematoxylin for 3 min, rinsing with running tap water for 3 min, differentiation with 1% hydrochloric acid / 75% alcohol for 5 s, washing with running water for 5 min, and then staining with eosin for 2 min, washing again and dehydrating with ascending concentrations of ethanol (70%, 95%, 100%), immersing in xylene for 5 min, and finally mounting with neutral resin. After the neutral gum was completely solidified, the sections were observed under a light microscope (Nikon, Japan).

**Sirius Red Staining**

The liver fibrosis was assessed via Sirius red staining using a commercial test kits (Beyotime Biotechnology, China). In detail, the paraffin-embedded liver tissues were cut into 4 µm-thickness sections. After dewaxing and rehydration, the sections were stained with iron hematoxylin for 3 min, washing twice with running water for 3 min, stained with Sirius red solution at room temperature for 30 min, thoroughly rinsed, and then routinely dehydrated with ethanol and cleared in xylene, finally sealed with neutral gum. The sections were observed under a light microscope (Nikon, Japan), and the Sirius red positive areas appeared in red which highlighted the collagen areas. The fibrosis ratio was calculated as value of Sirius red area / total area, each sample was independently reviewed by two separate researchers in a double-blind manner.

**Serum Transaminase Assay**

The liver function markers, including the levels of serum alanine aminotransferase (ALT) and aspartate aminotransferase (AST), were measured using a commercial test kits (Jiancheng Bioengineering, China) following the manufacturer’s instructions.

**Real-Time Quantitative PCR Assay**

Total RNA from intestinal tissues or cultured cells was extracted using Trizol reagent (Invitrogen, Life Technologies) according to the manufacturer’s instructions. Firstly, the mRNA was reverse transcribed into cDNA using a PrimeScript™ RT Master Mix Kit (TaKaRa, Japan) in a 20 μl reaction system, at 37 ℃ for 15 min and then at 85 ℃ for 5 s. Subsequently, the real-time quantitative PCR was performed using a QuantiTect SYBR Green PCR Master Mix Kit (Qiagen, Germany) in a 20 μl reaction volume on a Roche LightCycler® 480 Platform with amplification conditions of 95 ℃ for 15 min, followed by 40 cycles of 95 ℃ for 15 s, 54 ℃ for 30 s and 72 ℃ for 30 s. Each sample was conducted with two duplicates, and the reaction system without cDNA template was performed as a negative control. The primers used to amplify specific gene fragments were listed in Table S1. The glyceraldehyde-3-phosphate dehydrogenase (GAPDH) gene was served as internal reference, and the relative mRNA expression was quantified via the 2-ΔΔCT formula.

**Immunofluorescent Assay**

For tissue samples, the paraffin sections were underwent deparaffinization in xylene and rehydration with ethanol gradient. The tissue sections were subjected to heat-induced epitope retrieval in boiling citrate buffer for 10 min, cooled to room temperature, then blocked nonspecific sites with 5% (w/v) bovine serum albumin for 1 h, and permeabilized with 0.1% (v/v) Triton X-100 for 10 min.

For cultured cells, the ECs were seeded at an appropriate density on coverslips in 24-well plates. Upon achieving about 80% confluence, the cells were rinsed with phosphate-buffered saline (PBS) and fixed with 4% paraformaldehyde for 15 min at room temperature. Next, the cells were washed with PBS, permeabilized with 0.1% (v/v) Triton X-100 for 10 min, then washed again with PBS, blocked with 10% goat serum and 1% BSA for 30 min.

Sequentially, the slides were incubated with specific primary antibodies (Table S2) overnight at 4 °C. After equilibrating to room temperature, the slides were washed PBS, and then incubated Alexa Fluor 488 or 594-conjugate secondary antibodies for 1 h at room temperature. The concentrations of primary and secondary antibodies were conducted according to the recommendation in the instructions. As incubation completed, the slides were fully washed with PBS, and the nuclei were counterstained with 4′,6-diamidino-2-phenylindole (DAPI, 1 μg/ml) for 10 min. Finally, the slides were washed again in PBS, and the coverslips were mounted using an antifade mounting medium.

Fluorescence imaging was captured on a confocal laser scanning microscope (Nikon, Japan), and analyzed using NIS Elements Viewer software (Nikon, Japan). ImageJ software (National Institute of Health, USA) was employed to analyze the expression intensity of target protein. The positive staining was converted into pixels and IntDen (area × mean grey value) was calculated, which is an indirect assessment of protein expression.

**Flow Cytometry Assay**

Cell suspensions of intestinal tissues were prepared as previously described1. Briefly, fresh ileum/colon specimens (2-3 cm in length) were obtained, cut open, and thoroughly washed to remove mucus in precooling D-Hank’s balanced salt solution containing 1 mM dithiothreitol (DTT) and 1 mM ethylenediamine tetraacetic acid (EDTA) at 4 ℃. The specimens were cut into pieces (about 1 mm × 1 mm), and incubated in D-Hank’s solution containing 1 mg/ml Collagenase D, 2 mg/ml Disperse II and 1 mg/ml Dnase I in 37 ℃ water bath for 30 min. Separated intestinal cells were harvested after filtration and centrifugation, and further identified the microvascular endothelial cells (CD45-CD90-CD31+) via flow cytometry based on previous research2. The cell suspension was resuspended in binding buffer, and incubated with PerCP-Cy5.5-CD90 antibody, PE-Cy7-CD45 antibody, PE-CD31 antibody and FITC-Piezo1 antibody (Table S2) at 4 ℃ for 30 min. After a 2 min-treatment of DAPI, the cells were analyzed with a LSRFortessa flow cytometer (BD Biosciences, CA). Dead cells were removed from the analyses as DAPI-positive cells. The CD45-CD90-CD31+ ECs were identified, and Piezo1 expression intensity was quantified.

**Western Blot Analysis**

Total protein from intestinal tissues or cultured cells was extracted via RIPA lysis buffer supplemented with phosphatase and protease inhibitor cocktail. The protein concentration was quantified via a bicinchoninic acid (BCA) protein assay kit (Beyotime Biotech, China). The lysates were prepared in Laemmli loading buffer (1:4) and denatured in boiling water bath for 5 minutes. Protein lysates (80 mg) were loaded and separated by 10% sodium dodecyl sulfate-polyacrylamide gel electrophoresis (SDS-PAGE) at a constant voltage (100 V, 90 min) , and transferred to polyvinylidene fluoride (PVDF) membranes at a constant current (300 mA, 90 min) in an ice-water bath. The membranes were subsequently blocked in 5% (w/v) skim milk for 45 min at room temperature, and then incubated with specific primary antibodies according to the manufacturer's instructions (Table S2) overnight at 4 °C. After equilibrating to room temperature, the membranes were washed with TBST (Tris buffered saline with Tween®-20) for three times, and then incubated with horseradish peroxidase (HRP)-conjugated secondary antibodies for 1 h at room temperature. After washing again in TBST for three times, the protein bands were developed utilizing the SuperSignal West Pico Substrate (Pierce, USA), then visualized and quantified through the FluorChem FC3 platform (ProteinSimple, USA).

**Enzyme-Linked Immunosorbent Assay (ELISA)**

The serum concentration of inflammatory cytokines, such as TNF-α, IL-1β and IL-6, was determined using commercially available ELISA kits (Table S2) based on the manufacturer’s instructions. Briefly, specific enzyme-labeled reagent was added to the sample and standard wells accordingly. The plates were incubated at 37 °C for 30 min, and then TMB (3,3', 5,5;-tetramethylbenzidine) chromogen solutions A and B were added and mixed equally via gently shaken. Next, the plates were incubated in the dark at 37 °C for 10 min, stop solution was added to terminate the reaction. The optical density (OD) of each well was rapidly measured at 450 nm via a microplate reader (BIOBASE, China). The concentration of the target proteins was calculated according to the standard curve.

**Calcium Imaging Analysis**

The intracellular calcium concentration in ECs was measured via the Ca2+-sensitive fluorescent dye Fluo4-AM (F14217, Invitrogen, Life Science). ECs were pre-seeded at an appropriate density on coverslips in 24-well plates, accordingly, the intervention with Yoda1 or hydrostatic pressure was performed. The cells were incubated in 1 μM Fluo4-AM loading solution in a dark incubator at 37 ℃ for 15 min, then washed with PBS that was prewarmed to 37 ℃. Fluorescent images were obtained via confocal laser scanning microscope (Nikon, Japan) at 488 nm.

**RNA Sequencing and Analysis**

Total RNA were extracted using the Trizol reagent (Invitrogen, Life Technologies) from intestinal microvascular ECs treating with 1μM Yoda1 or DMSO for 48h. The libraries for RNA-seq were prepared using the VAHTS Stranded mRNA-seq Library Prep Kit for Illumina NovaSeq 6000 platforms as recommended by the manufacturer’s instructions. The initial RNA-Seq reads dataset was underwent filtration and adapter trimming to secure premium-quality. High-quality reads were then mapped to the human reference genome using the Tophat v2.0.9. The expression level of each gene was quantified using HTSeq-count. Differential expression genes (DEGs) analysis was performed using the DESeq2 v1.4.5, with a stringent cut-off of |log₂ fold change| ≥ 1 and p-value <0.05. DEGs were presented in volcano plots generated using the ggplot2 package in R software. The enriched functions and signaling pathways were annotated through the Gene Ontology (GO) and the Kyoto Encyclopedia of Genes and Genomes (KEGG) database with a False Discovery Rate (FDR) threshold of 0.05. Gene set enrichment analysis (GSEA) was further performed to identify the pathways associated with core gene expression using the clusterProfiler package in R software v4.2.3. The raw RNA-seq data was published in the Sequence Read Archive (SRA) database with Bioproject number PRJNA1415200.

**References:**

1. van Beijnum JR, Rousch M, Castermans K, van der Linden E, Griffioen AW. Isolation of endothelial cells from fresh tissues. Nat Protoc. 2008;3:1085-91.
2. Ogasawara R, Hashimoto D, Kimura S, et al. Intestinal Lymphatic Endothelial Cells Produce R-Spondin3. Sci Rep. 2018;8:10719.
