# Supplementary material
Source: Research Square preprint supplement (doi:10.21203/rs.3.rs-9418908/v1)
Supplement: Supplementary file 6 [file bdd7dbd72bf9fd83c970557c.docx]

**Table S1 The primer sequences used in real-time qPCR assay.**

| **Gene** | **Forward primer (5′- 3′)** | **Reverse primer (5′- 3′)** |
| --- | --- | --- |
| **Human** |  |  |
| *Piezo1* | GGACTCTCGCTGGTCTACCT | GGGCACAATATGCAGGCAGA |
| *TNF-α* | GAGGCCAAGCCCTGGTATG | CGGGCCGATTGATCTCAGC |
| *IL-1β* | ATGATGGCTTATTACAGTGGCAA | GTCGGAGATTCGTAGCTGGA |
| *IL-6* | ACTCACCTCTTCAGAACGAATTG | CCATCTTTGGAAGGTTCAGGTTG |
| *PV1* | CCGGGTCATCTACACGAACAA | CCTTGAATTGATCTCTGCATTGC |
| *CDH5* | AAGCGTGAGTCGCAAGAATG | TCTCCAGGTTTTCGCCAGTG |
| *Occludin* | ACAAGCGGTTTTATCCAGAGTC | GTCATCCACAGGCGAAGTTAAT |
| *Claudin1* | TCTGGCTATTTTAGTTGCCACAG | AGAGAGCCTGACCAAATTCGT |
| *ZO1* | CAACATACAGTGACGCTTCACA | CACTATTGACGTTTCCCCACTC |
| *JAM-A* | GTGCCTACTCGGGCTTTTCTT | GTCACCCGGTCCTCATAGGAA |
| *VEGFR2* | AACGTGTCACTTTGTGCAAGA | TTCCATGAGACGGACTCAGAA |
| *GAPDH* | CTGGGCTACACTGAGCACC | AAGTGGTCGTTGAGGGCAATG |
| **Mouse** |  |  |
| *VEGFR2* | TTTGGCAAATACAACCCTTCAGA | GCAGAAGATACTGTCACCACC |
| *GAPDH* | AGGTCGGTGTGAACGGATTTG | GGGGTCGTTGATGGCAACA |
